# Supplementary material for: Tuning magnetic anisotropy by the π-bonding features of the axial ligands and the electronic effects of gold(i) atoms in 2D {Co(L)2[Au(CN)2]2}nmetal–organic frameworks with field-induced single-ion magnet behaviour
Source: Royal Society of Chemistry journal article supplement (doi:10.1039/d0qi00996b), 2020-01-01
Supplement: d0qi00996b1.pdf [file d0qi00996b1.pdf]

## Supplementary Material

**Tuning magnetic anisotropy by the p-bonding features of the axial ligands and the electronic effects of gold(I) atoms in  $\text{CoN}_4\text{X}_2$  (X =N, O) field induced Single-Ion Magnets nodes of 2D  $\{\text{Co}(\text{L})_2[\text{Au}(\text{CN})_2]_2\}_n$  metal-organic frameworks.**

María A. Palacios, Ismael F. Díaz-Ortega, Hiroyuki Nojiri, Elizaveta A. Suturina,  
Mykhaylo Ozerov, J. Krzystek, Enrique Colacio

**Table S1.-** Crystallographic data for complexes **1**, **3-5**.

| Compound                             | <b>1(DMSO)</b>                                                       | <b>3 (py)</b>                                     | <b>4(bzpy)</b>                                                | <b>5 (naphthalene)</b>                              |
|--------------------------------------|----------------------------------------------------------------------|---------------------------------------------------|---------------------------------------------------------------|-----------------------------------------------------|
| Formula                              | $\text{C}_8\text{H}_{12}\text{Au}_2\text{CoN}_4\text{O}_2\text{S}_2$ | $\text{C}_7\text{H}_5\text{AuCo}_{0.5}\text{N}_3$ | $\text{C}_{28}\text{H}_{18}\text{Au}_2\text{CoN}_6\text{O}_2$ | $\text{C}_{34}\text{H}_{26}\text{Au}_2\text{CoN}_6$ |
| $M_r$                                | 713.20                                                               | 357.57                                            | 923.35                                                        | 971.47                                              |
| Crystal system                       | Monoclinic                                                           | Monoclinic                                        | Monoclinic                                                    | Monoclinic                                          |
| Space group                          | $P2_1/c$                                                             | $P2_1/c$                                          | $P2_1/c$                                                      | $C2/c$                                              |
| a (Å)                                | 7.4006(3)                                                            | 7.1352(3)                                         | 13.1531(5)                                                    | 20.2748(17)                                         |
| b (Å)                                | 14.3681(5)                                                           | 13.9841(6)                                        | 13.5483(5)                                                    | 10.4871(7)                                          |
| c (Å)                                | 14.9002(6)                                                           | 8.4042(4)                                         | 15.5142(5)                                                    | 16.0466(12)                                         |
| $\alpha$ (°)                         | 90                                                                   | 90                                                | 90                                                            | 90                                                  |
| $\beta$ (°)                          | 93.6693(18)                                                          | 95.735(2)                                         | 93.7020(17)                                                   | 115.017(2)                                          |
| $\gamma$ (°)                         | 90                                                                   | 90                                                | 90                                                            | 90                                                  |
| V (Å <sup>3</sup> )                  | 1581.13(11)                                                          | 834.37(6)                                         | 2758.90(17)                                                   | 3091.8(4)                                           |
| Z                                    | 4                                                                    | 4                                                 | 4                                                             | 4                                                   |
| Dc (g cm <sup>-3</sup> )             | 2.996                                                                | 2.847                                             | 2.223                                                         | 2.087                                               |
| m(MoK $\alpha$ ) (mm <sup>-1</sup> ) | 19.813                                                               | 18.528                                            | 11.240                                                        | 10.031                                              |
| T (K)                                | 100(2)                                                               | 293(2)                                            | 100(2)                                                        | 100(2)                                              |
| Observed reflections <sub>a</sub>    | 4075 (3335)                                                          | 2135 (2103)                                       | 6398 (4724)                                                   | 3190 (3120)                                         |
| $R_{\text{int}}$                     | 0.0362                                                               | 0.0333                                            | 0.0585                                                        | 0.0611                                              |
| Parameters                           | 176                                                                  | 106                                               | 352                                                           | 199                                                 |
| GOF                                  | 1.320                                                                | 0.747                                             | 0.814                                                         | 0.700                                               |
| $R_1^{\text{b,a}}$                   | 0.0485 (0.0372)                                                      | 0.0182 (0.0179)                                   | 0.0562 (0.0317)                                               | 0.0290 (0.0276)                                     |

|                                                                                                                                                                                                                       |                 |                    |                 |                 |
|-----------------------------------------------------------------------------------------------------------------------------------------------------------------------------------------------------------------------|-----------------|--------------------|-----------------|-----------------|
| $wR_2^{c,a}$                                                                                                                                                                                                          | 0.1747 (0.1669) | 0.0768<br>(0.0701) | 0.1176 (0.0945) | 0.0750 (0.0737) |
| <sup>a</sup> Values in parentheses for reflections with $I > 2\sigma(I)$ .<br><sup>b</sup> $R_1 =   F_o  -  F_c  /\Sigma F_o $ .<br><sup>c</sup> $wR_2 = \{\Sigma[w(F_o^2 - F_c^2)^2] / \Sigma[w(F_o^2)^2]\}^{1/2}$ . |                 |                    |                 |                 |

**Table S2.-** Continuous Shape Measures calculations for **1-5**.

-----  
S H A P E v2.1      Continuous Shape Measures calculation  
(c) 2013 Electronic Structure Group, Universitat de Barcelona  
Contact: llunell@ub.edu  
-----

JPPY-6      5 C5v   Johnson pentagonal pyramid J2  
TPR-6      4 D3h   Trigonal prism  
OC-6      3 Oh   Octahedron  
PPY-6      2 C5v   Pentagonal pyramid  
HP-6      1 D6h   Hexagon

JPPY-6      5 C5v   Johnson pentagonal pyramid J2  
TPR-6      4 D3h   Trigonal prism  
OC-6      3 Oh   Octahedron  
PPY-6      2 C5v   Pentagonal pyramid  
HP-6      1 D6h   Hexagon

Complex 1

Structure [ML6 ]      JPPY-6      TPR-6      OC-6      PPY-6      HP-6      33.075,  
16.317,      0.038,      29.637,      32.528.

Complex 2

Structure [ML6 ]      JPPY-6      TPR-6      OC-6      PPY-6      HP-6,      32.149,  
15.542,      0.103,      28.650,      31.823.

### Complex 3

Structure [ML6 ]    JPPY-6    TPR-6    OC-6    PPY-6    HP-6, 33.742,  
16.677,    0.003,    30.222,    33.079.

### Complex 4

Structure [ML6 ]    JPPY-6    TPR-6    OC-6    PPY-6    HP-6,    32.096,  
15.669,    0.126,    28.596,    32.303.

### Complex 5

Structure [ML6 ]    JPPY-6    TPR-6    OC-6    PPY-6    HP-6    ,  
32.547,    15.837,    0.070,    29.003,    33.231

**Table S3.** SOC-CASSCF(7,5)/NEVPT2 computed eigenvalues of the effective g-tensor of the lowest Kramers doublet (the values calculated including gold(I) atoms are given in red color)

| Compound | $g'_1$ | $g'_2$ | $g'_3$ |
|----------|--------|--------|--------|
| DMF      | 2.610  | 4.864  | 5.598  |
|          | 2.176  | 2.805  | 7.363  |
| DMSO     | 2.433  | 3.344  | 6.940  |
|          | 1.924  | 3.324  | 6.900  |
| Pyridine | 1.985  | 3.614  | 6.684  |
|          | 2.262  | 4.217  | 6.104  |
| PyPhCO   | 1.956  | 4.130  | 6.294  |
|          | 2.622  | 4.598  | 5.570  |

**Table S4.**  $S_{\text{eff}} = 1/2$  Hamiltonian parameters determined from HFEPR of the investigated complexes.

|                     | $g_x$ | $g_y$ | $g_z$ |
|---------------------|-------|-------|-------|
| Co-Au-DMSO <b>1</b> | 6.05  | 3.59  | 1.92  |
| Co-Au-DMF <b>2</b>  | 2.65  | 2.95  | 6.55  |
| Co-Au-Py <b>3</b>   | 5.21  | 4.60  | 2.58  |
| Co-Au-BzPy <b>4</b> | 3.15  | 3.78  | 5.58  |

**Table S5.** Spin Hamiltonian parameters computed with SOC-CASSCF(7,5)/NEVPT2 for **1-4** and obtained by different experimental techniques.

|             | Method         | D, cm <sup>-1</sup> | E/D     | $\delta = 2\sqrt{D^2 + 3E^2}$ | $g_1$ | $g_2$ | $g_3$ | $\frac{1}{3}\sqrt{g_1^2 + g_2^2 + g_3^2}$ | $g'_1$ | $g'_2$ | $g'_3$ | relaxation time (s) at 2K and 0.1 Tesla |
|-------------|----------------|---------------------|---------|-------------------------------|-------|-------|-------|-------------------------------------------|--------|--------|--------|-----------------------------------------|
| 1<br>DMSO   | calculation    | 80                  | 0.203   | 170                           | 1.918 | 2.437 | 2.795 | 2.410                                     | 1.92   | 3.32   | 6.90   |                                         |
|             | Susceptibility | 68(1)               | fixed 0 | 136                           | -     | -     | -     | 2.610(7)                                  | 2.61   | 2.61   | 5.03   |                                         |
|             | HFEPR+FIRMS    | 71.8                | 0.17    | 150                           | 2.10  | 2.47  | 2.48  |                                           |        |        |        |                                         |
|             | HFEPR          |                     |         |                               |       |       |       |                                           | 1.92   | 3.59   | 6.05   |                                         |
|             | AC SQUID       |                     |         |                               |       |       |       |                                           |        |        |        | 9*10 <sup>-4</sup>                      |
| 2<br>DMF    | calculation    | 111                 | 0.253   | 242                           | 1.683 | 2.198 | 2.989 | 2.352                                     | 2.176  | 2.805  | 7.363  |                                         |
|             | Susceptibility | 90(2)               | fixed 0 | 180                           | -     | -     | -     | 2.687(6)                                  | 2.42   | 2.42   | 7.02   |                                         |
|             | FIRMS          |                     |         | 258                           |       |       |       |                                           |        |        |        |                                         |
|             | HFEPR          |                     |         |                               |       |       |       |                                           | 2.65   | 2.95   | 6.55   |                                         |
|             | AC SQUID       |                     |         |                               |       |       |       |                                           |        |        |        | 2.8*10 <sup>-4</sup>                    |
| 3<br>Py     | calculation    | 85                  | 0.095   | 172                           | 1.938 | 2.578 | 2.713 | 2.433                                     | 2.26   | 4.22   | 6.10   |                                         |
|             | Susceptibility | 75(2)               | fixed 0 | 140                           | -     | -     | -     | 2.531(7)                                  | 2.89   | 2.89   | 4.80   |                                         |
|             | HFEPR+FIRMS    | 91.3                | 0.04    | 183                           | 2.46  | 2.46  | 2.60  |                                           |        |        |        |                                         |
|             | FIRMS          |                     |         |                               |       |       |       |                                           |        |        |        |                                         |
|             | HFEPR          |                     |         |                               |       |       |       |                                           | 2.58   | 4.60   | 5.21   |                                         |
| 4<br>PyPhCO | calculation    | 99                  | 0.053   | 199                           | 1.926 | 2.551 | 2.701 | 2.416                                     | 2.62   | 4.60   | 5.57   |                                         |
|             | Susceptibility | 80(1)               | fixed 0 | 160                           | -     | -     | -     | 2.605(1)                                  | 2.92   | 2.92   | 6.46   |                                         |
|             | FIRMS          |                     |         | 193?                          |       |       |       |                                           |        |        |        |                                         |
|             | HFEPR          |                     |         |                               |       |       |       |                                           | 3.15   | 3.78   | 5.58   |                                         |
|             | AC SQUID       |                     |         |                               |       |       |       |                                           |        |        |        | 2.6*10 <sup>-4</sup>                    |



**Figure S2.-** *Simplified* Energy Level Diagram for the Splitting of the  ${}^4T_{1g}$  Ground State by an axial crystal field , second-order SOC and external magnetic field. D is the axial orbital splitting of the  ${}^4T_{1g}$ , while d is the energy gap between the  $\pm 3/2$  and  $\pm 1/2$  Kramers doublet provoked by the second order SOC.

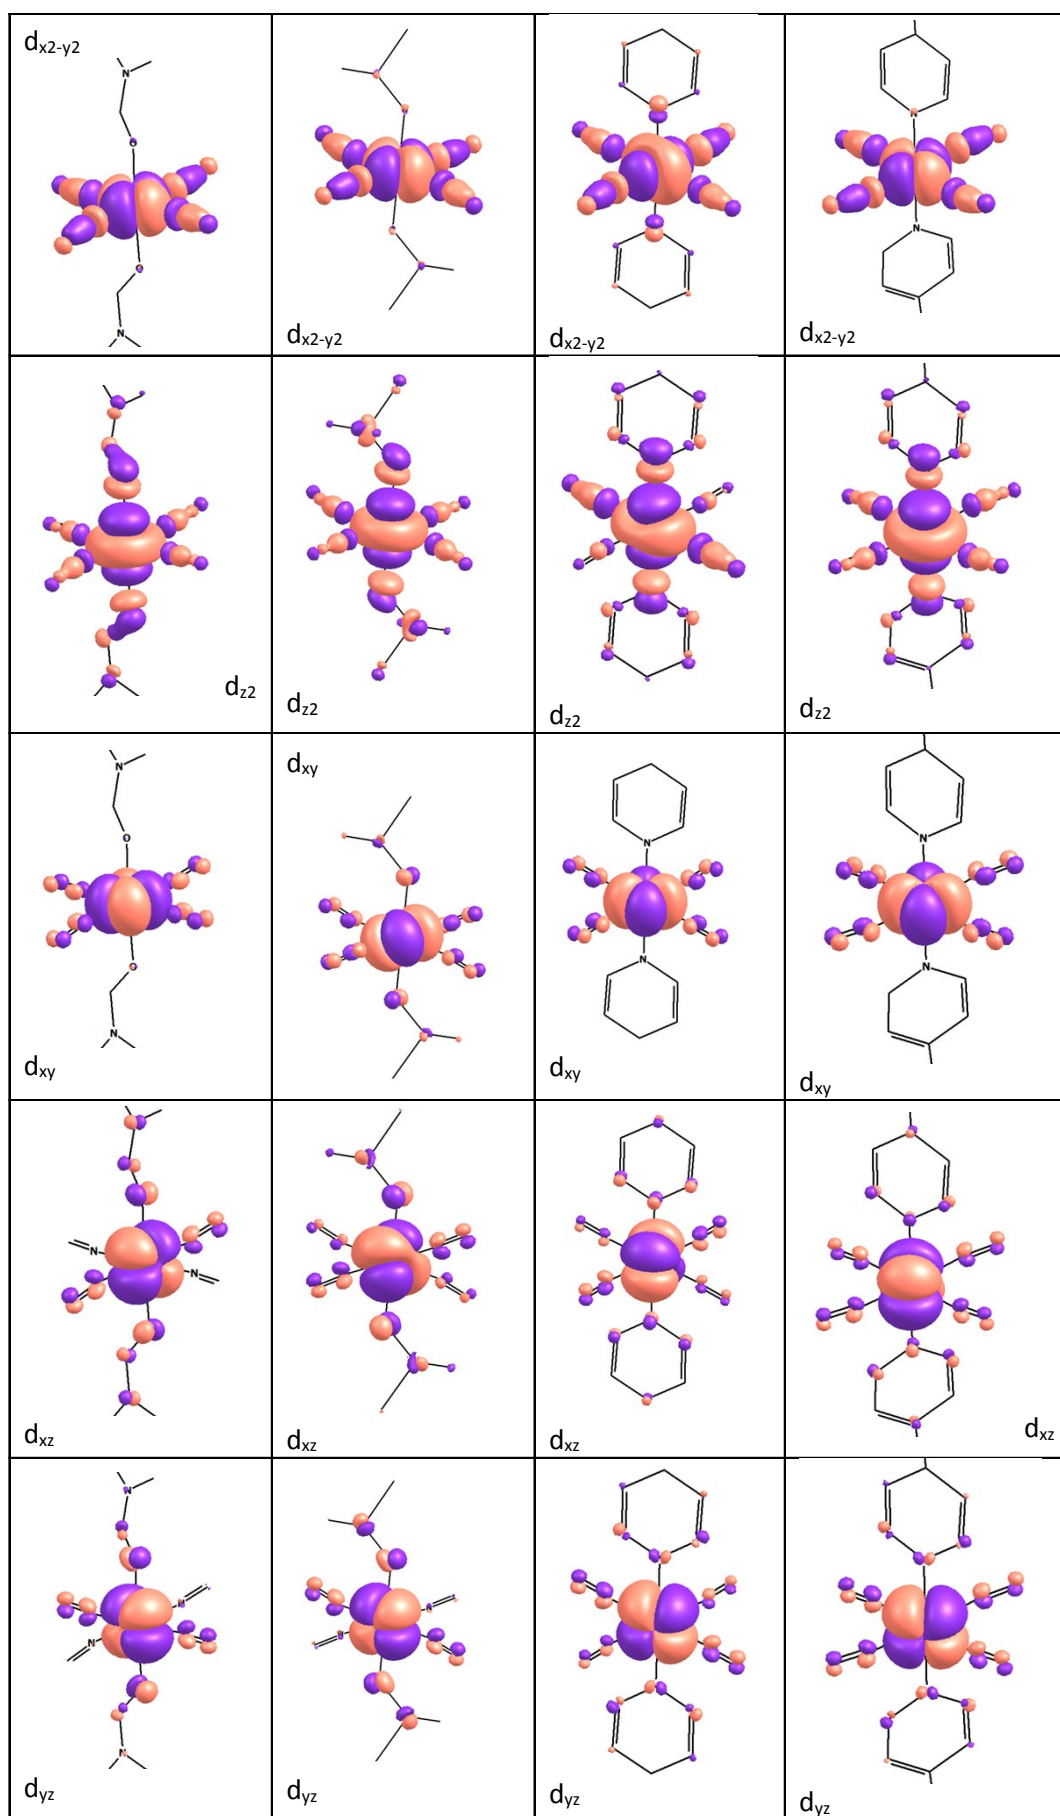

**Figure S3.** Ab initio ligand field orbitals excluding gold (I) atoms

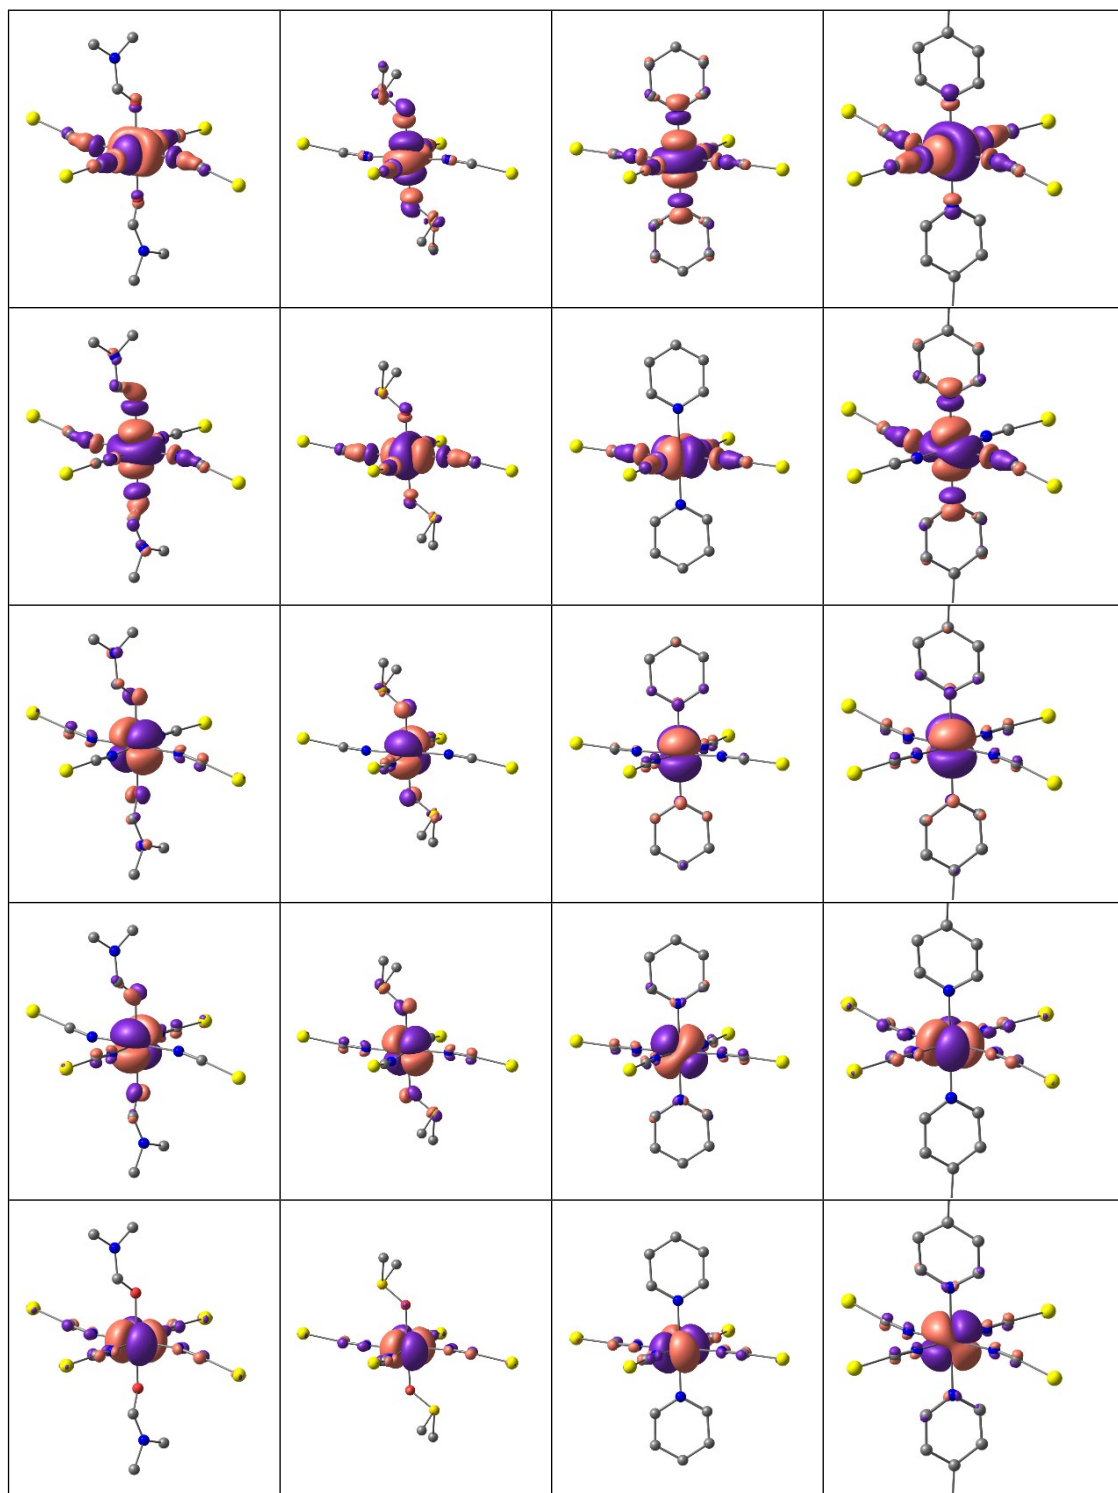

**Figure S4.** Ab initio ligand field orbitals including gold (I) atoms



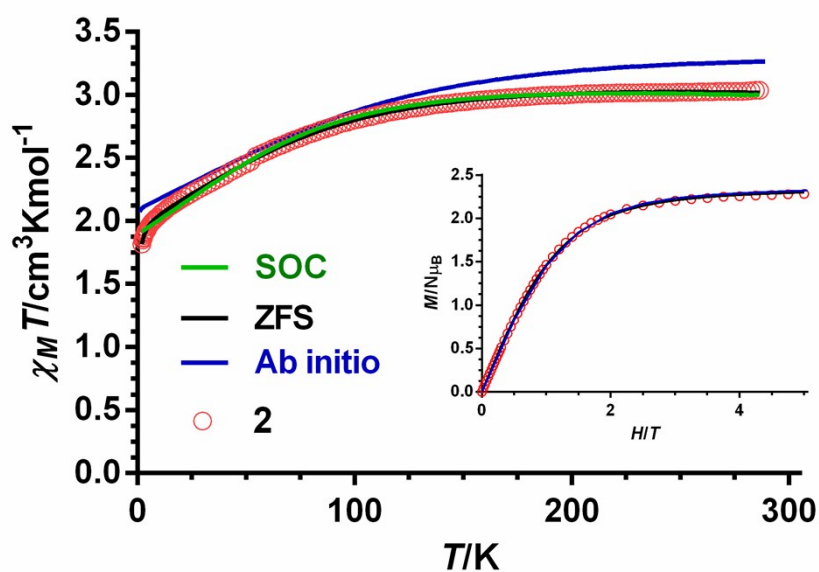

**Figure S5** .- Temperature dependence of  $\chi_M T$  for compound **2** (red circles). Black and green solid lines represent the best fit to equations 1 and 2, respectively. Blue solid line generated from the *ab initio* calculated energy levels including gold(I) atoms.

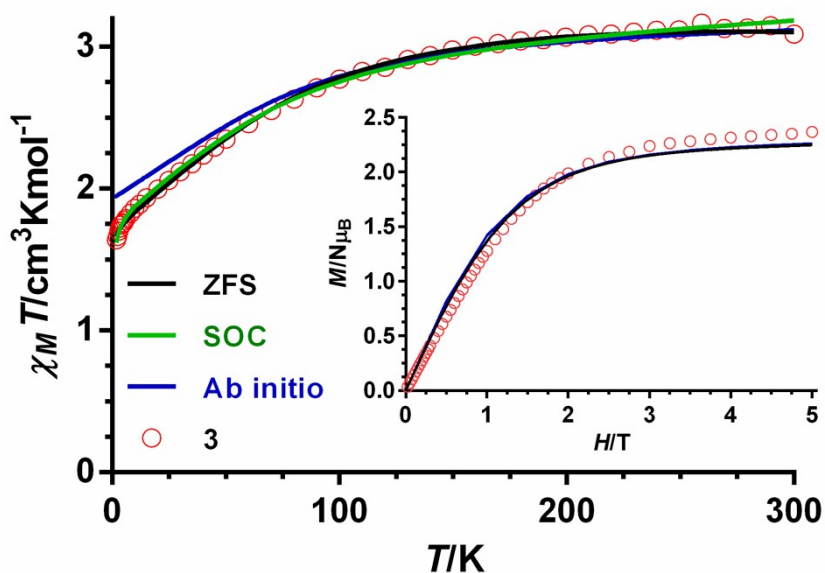

**Figure S6** .- Temperature dependence of  $\chi_M T$  for compound **3** (red circles). Black and green solid lines represent the best fit to equations 1 and 2, respectively. Blue solid line generated from the *ab initio* calculated energy levels including gold(I) atoms.

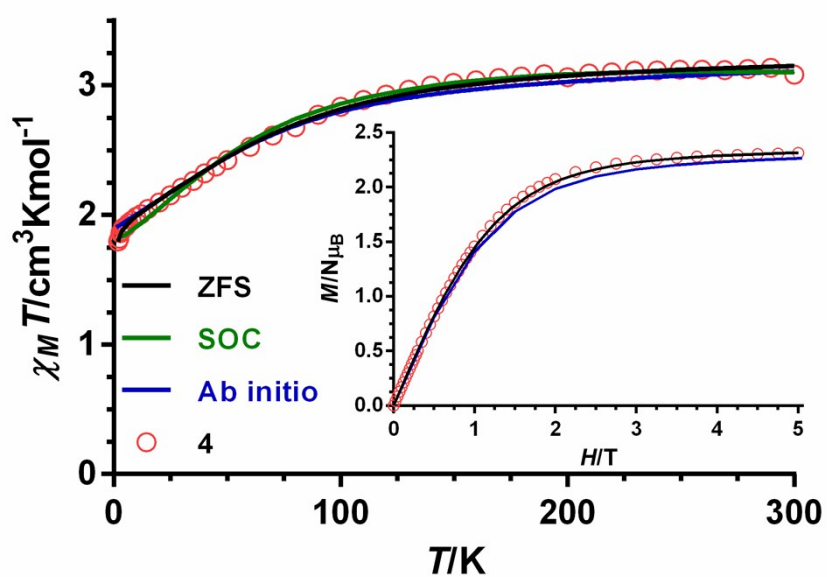

**Figure S7.-** Temperature dependence of  $\chi_M T$  for compound 4 (red circles). Black and green solid lines represent the best fit to equations 1 and 2, respectively. Blue solid line generated from the *ab initio* calculated energy levels including gold(I) atoms.

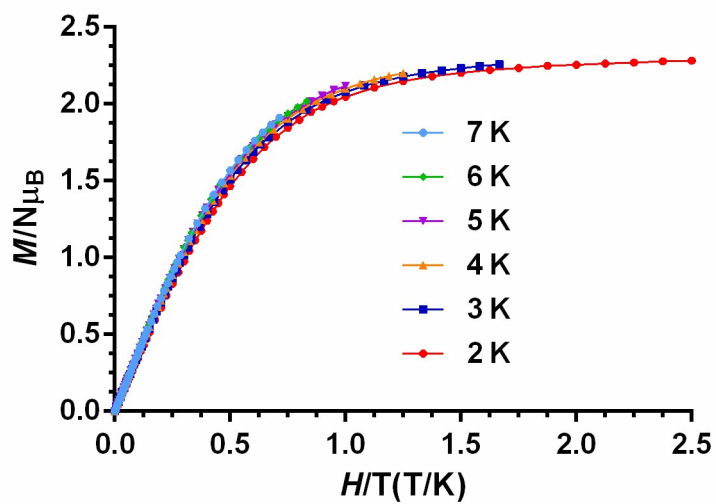

**Figure S8.-**  $M$  vs  $H/T$  isotherms for compound 2 at the indicated temperatures.

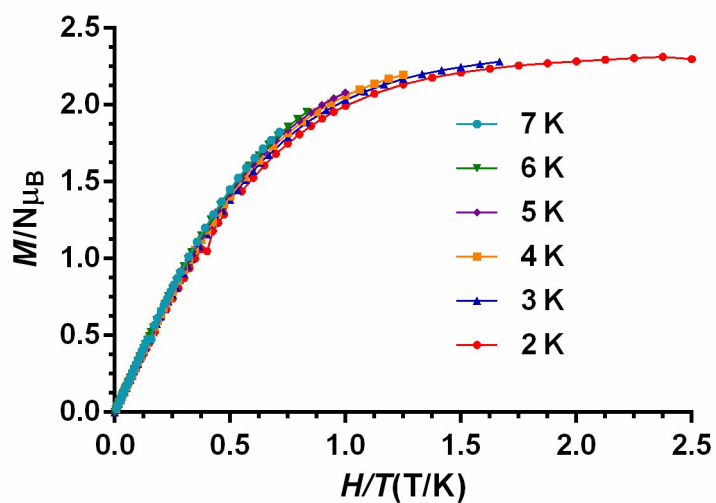

Figure S9.-  $M$  vs  $H/T$  isotherms for compound **3** at the indicated temperatures.

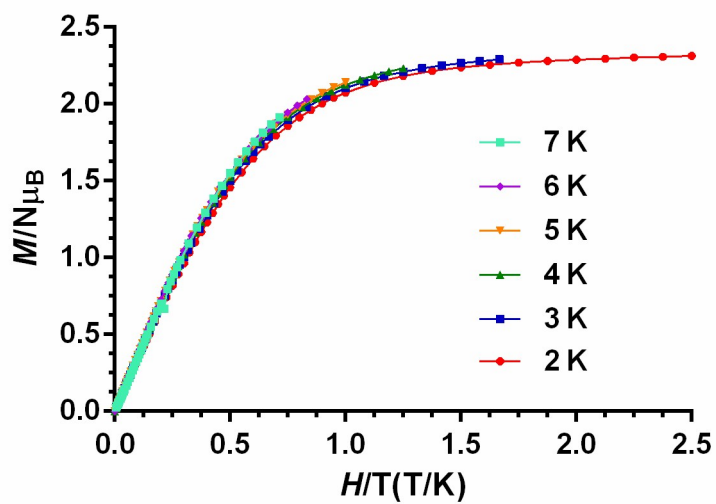

Figure S10.-  $M$  vs  $H/T$  isotherms for compound **4** at the indicated temperatures.

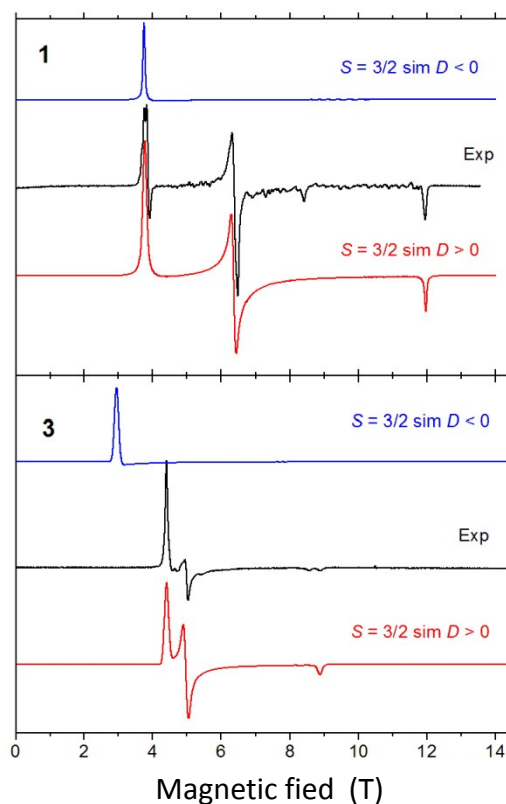

**Figure S11.** Top: an EPR spectrum of **1** at 321.6 GHz and 7 K accompanied by simulations using  $S = 3/2$  spin Hamiltonian parameters:  $|D| = 71.8 \text{ cm}^{-1}$ ,  $|E| = 12.4 \text{ cm}^{-1}$  ( $E/D = 0.17$ );  $g_x = 2.47$ ;  $g_y = 2.48$ ;  $g_z = 2.10$ . Bottom: an EPR spectrum of **3** at 321.6 GHz and 10 K accompanied by simulations using  $S = 3/2$  spin Hamiltonian parameters:  $|D| = 91.3 \text{ cm}^{-1}$ ,  $|E| = 3.65 \text{ cm}^{-1}$  ( $E/D = 0.04$ );  $g_x = 2.46$ ;  $g_y = 2.46$ ;  $g_z = 2.60$ . The  $g_z$  value is tentative only since there are two features in the same high- $g$  spectral range and either one could be the parallel turning point. The HFEPR spectra of **2** and **4** cannot be simulated using  $S = 3/2$  spin Hamiltonian parameters but only an effective  $S = 1/2$  Hamiltonian (Figure S12)

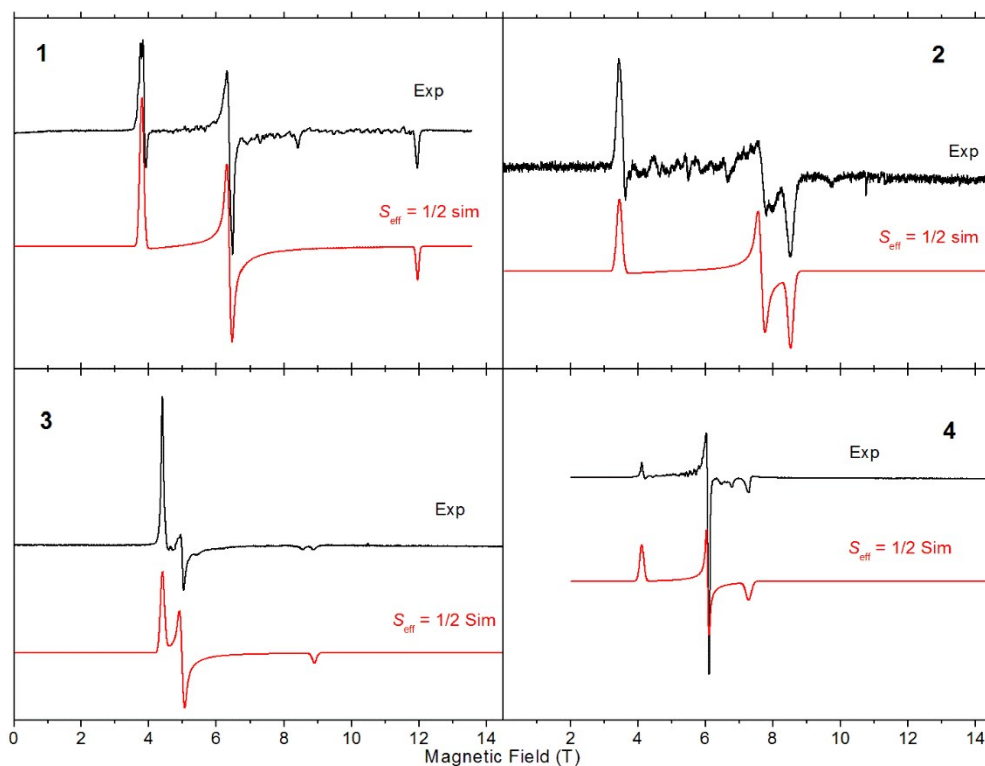

**Figure S12.-** HFEPR spectra of **1-4** at 321.6 GHz (**1**, **3** and **4**), 316.8 GHz (**2**), and 7 K (**1** and **4**) and 10 K (**2** and **3**). Simulations using an effective  $S = 1/2$  Hamiltonian appear as red lines. Hamiltonian parameters appear above in Table S4.

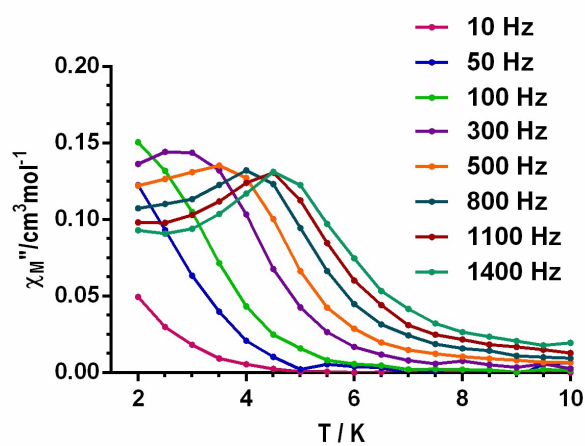

**Figure S13.-** Temperature dependence of the out-of-phase ( $\chi''$ ) for **1** under a  $H_{dc} = 0.1$  T Oe at different frequencies

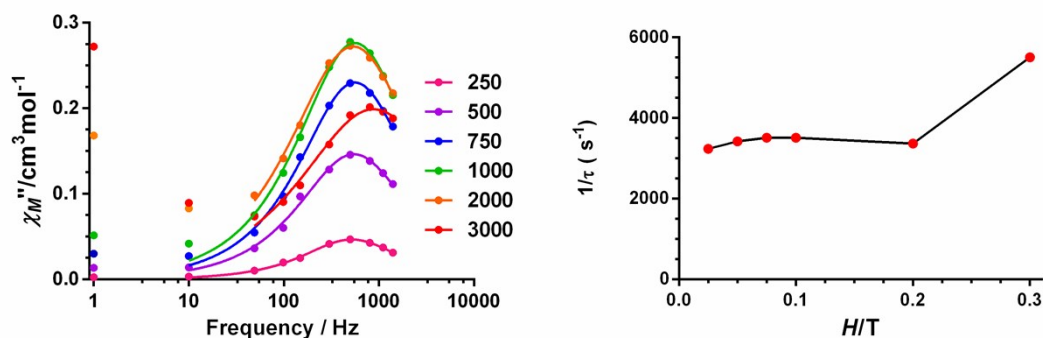

**Figure S14.-** Field dependence of the out-of-phase signal ( $\chi''_M$ ) at 2 K for **2** (left). Field dependence of the relaxation times for **2** (right).

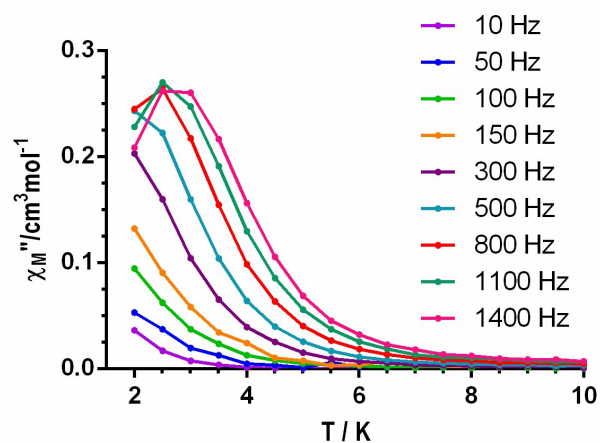

**Figure S15.-** Temperature dependence of the out-of-phase ( $\chi''$ ) for **2** under a  $H_{dc} = 0.1$  T Oe at different frequencies

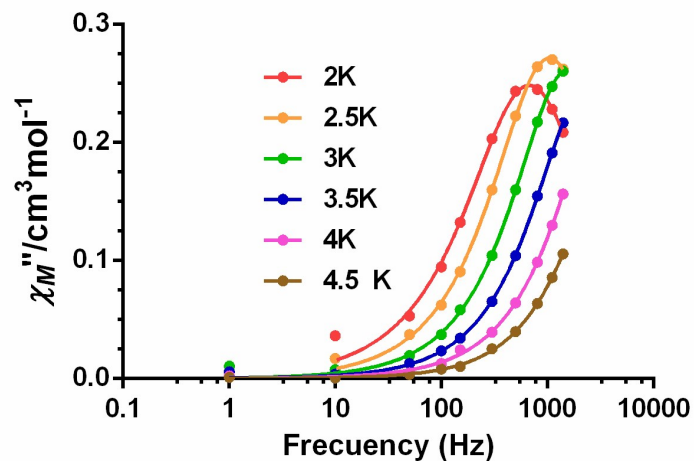

**Figure S16.-** Frequency dependence of the out-of-phase ( $\chi''$ ) for **2** under a  $H_{dc} = 0.1$  T at different temperatures.

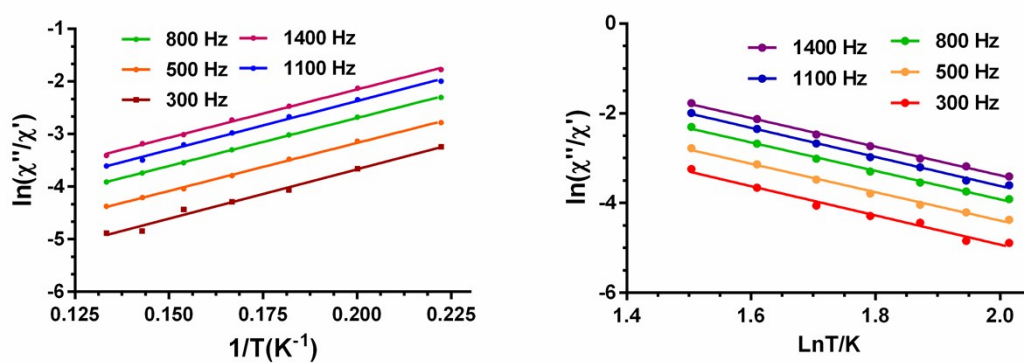

**Figure S17.-** Temperature dependence of the ratio of the in-phase and out-of-phase ac components at different frequencies under a magnetic field of 0.1 T for **2**. Solid lines correspond to the fit of the experimental data to equation 6 (left) and equation 7 (right).

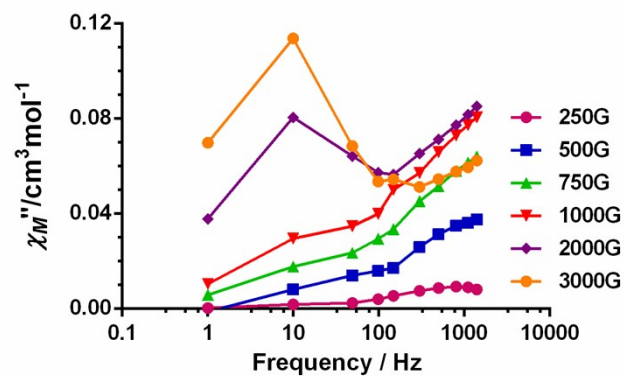

**Figure S18.-** Field dependence of the out-of-phase signal ( $\chi''_M$ ) at 2 K for **3**

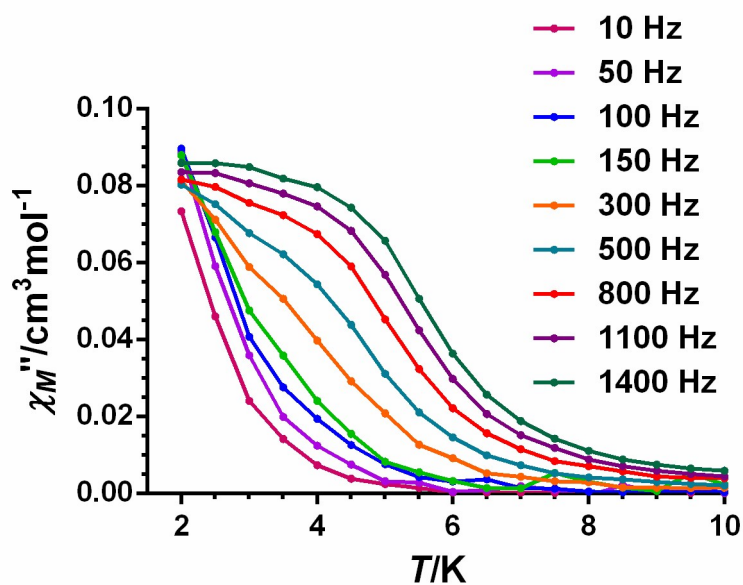

**Figure S19.-** Temperature dependence of the out-of-phase ( $\chi''$ ) for **3** under a  $H_{dc} = 0.1$  T Oe at different frequencies



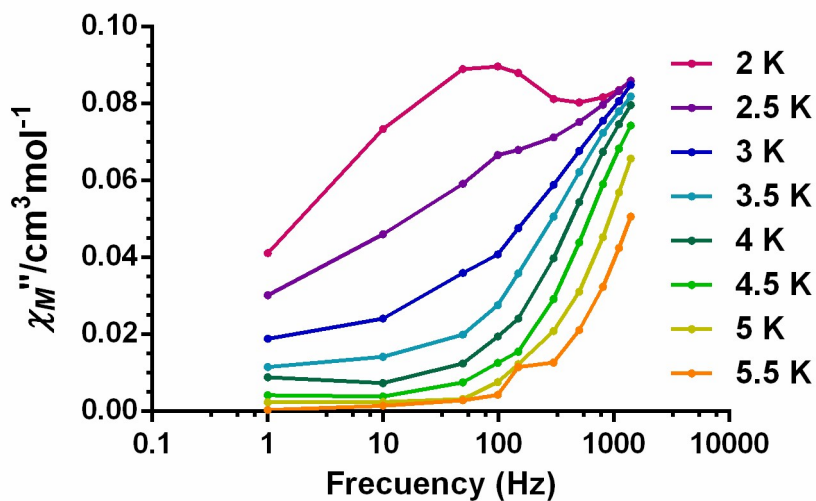

**Figure S20.-** Frequency dependence of the out-of-phase ( $\chi''$ ) for **3** under a  $H_{dc} = 0.1$  T at different temperatures.

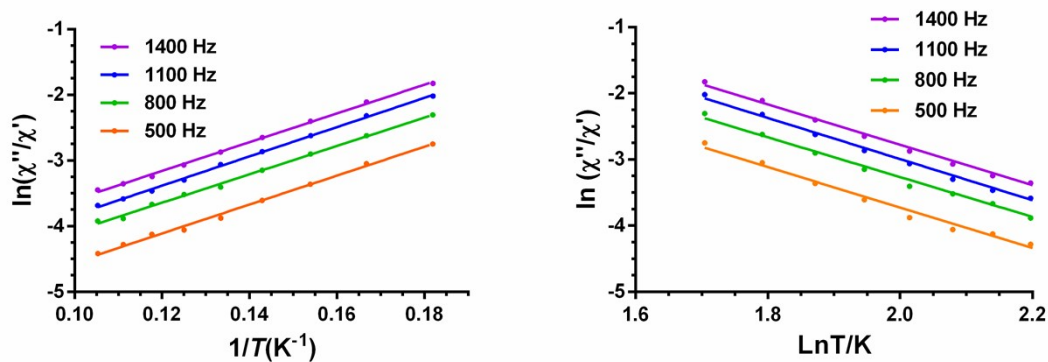

**Figure S21.-** Temperature dependence of the ratio of the in-phase and out-of-phase ac components at different frequencies under a magnetic field of 0.1 T for **3**. Solid lines correspond to the fit of the experimental data to equation 6 (left) and equation 7 (right).

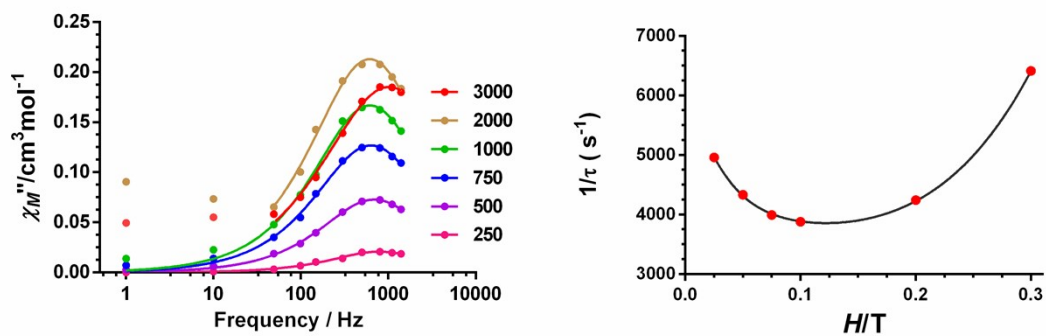

**Figure S22.-** Field dependence of the out-of-phase signal ( $\chi''_M$ ) at 2 K for **4** (left). Field dependence of the relaxation times for **4** (right).

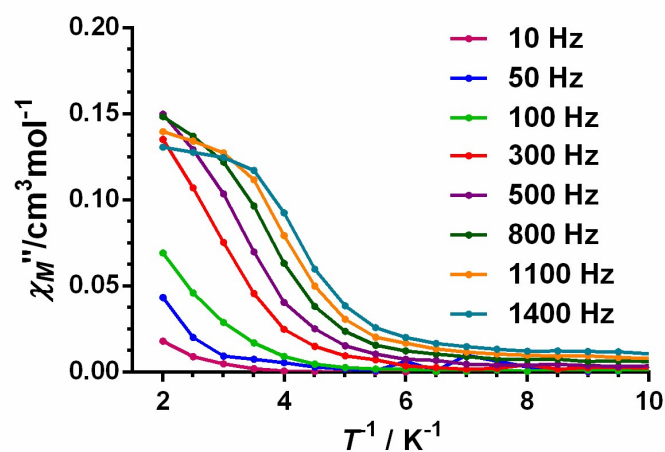

**Figure S23.-** Temperature dependence of the out-of-phase ( $\chi''$ ) for **4** under a  $H_{dc} = 0.1$  T Oe at different frequencies

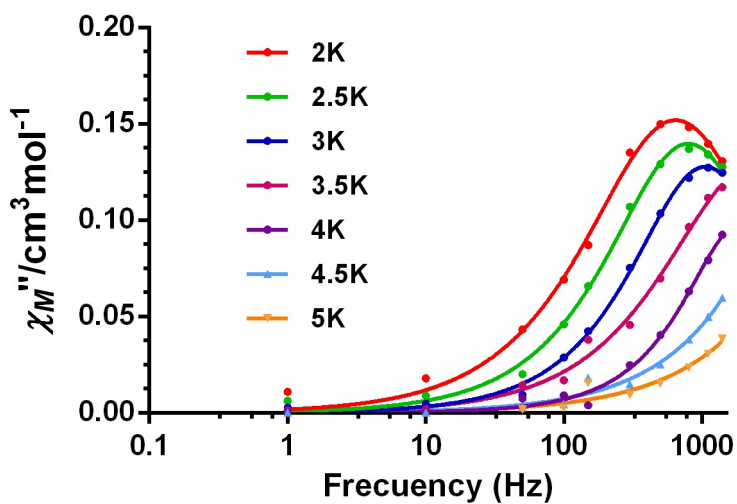

**Figure S24.-** Frequency dependence of the out-of-phase ( $\chi''$ ) for **4** under a  $H_{dc} = 0.1$  T at different temperatures.

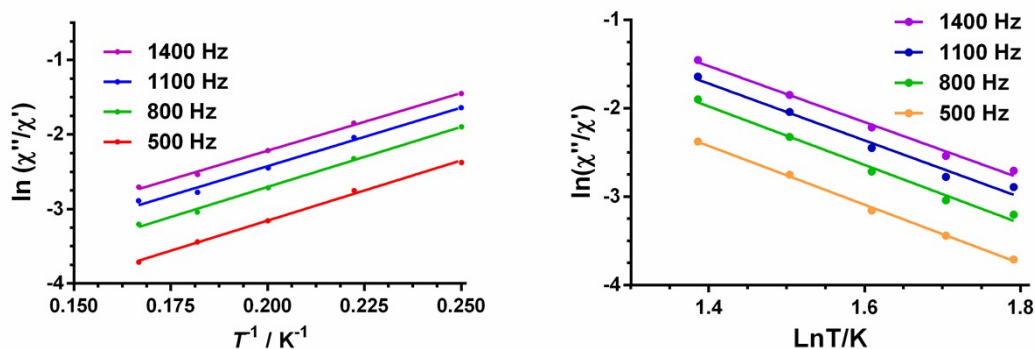

**Figure S25.-** Temperature dependence of the ratio of the in-phase and out-of-phase ac components at different frequencies under a magnetic field of 0.1 T for **4**. Solid lines correspond to the fit of the experimental data to equation 6 (left) and equation 7 (right).

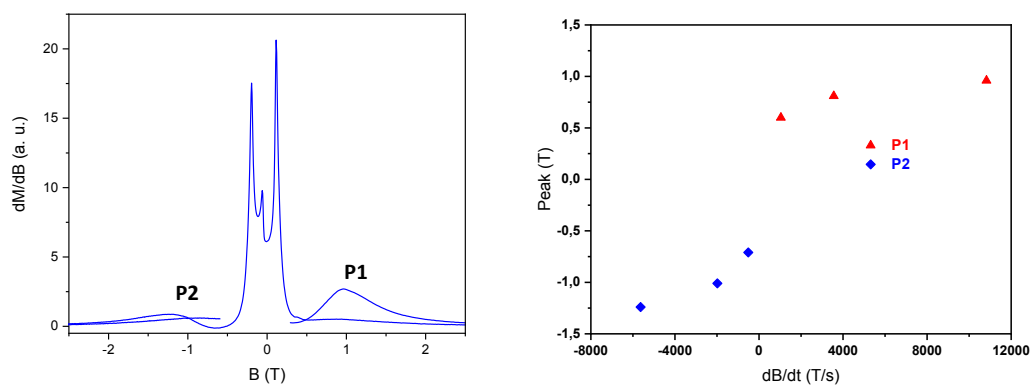

**Figure S26.-** Differential of magnetization measured at 0.4 K and 5.2 T/ms (left) and sweep rate dependence of peaks P1-P2 (right) for compound **1**.

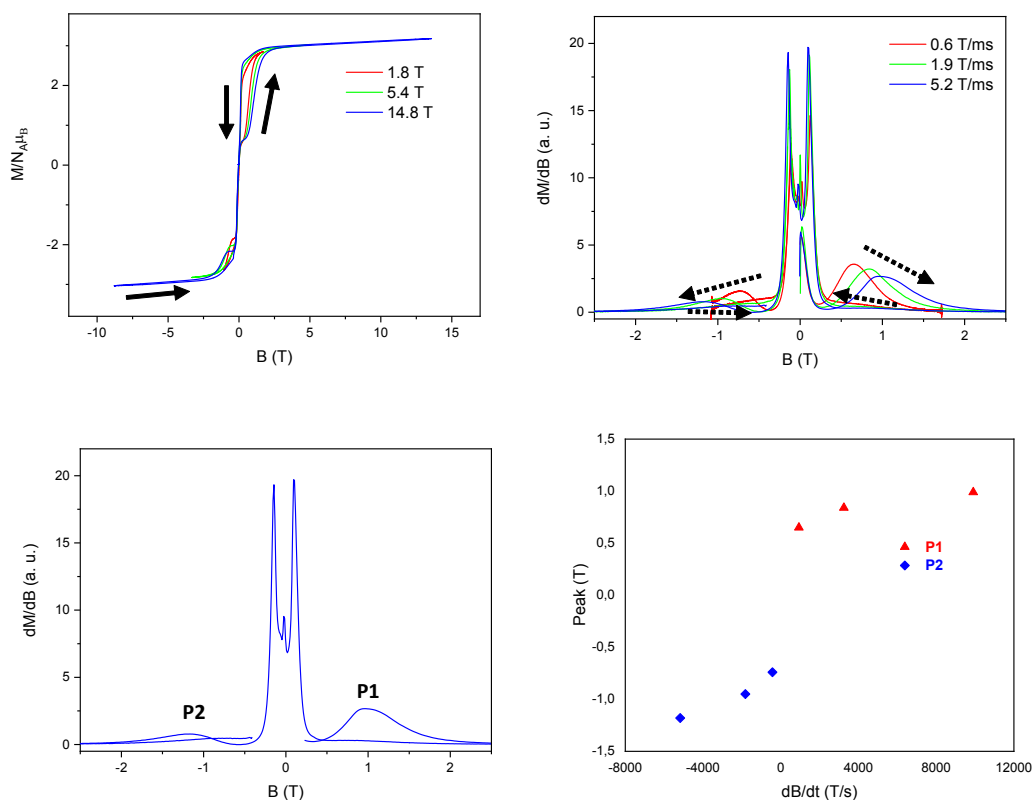

**Figure S27.-** Pulse-field (top left) and differentiate (top right) magnetizations curves for **2** at 0.4 K and at different scan field rates. Differential of magnetization measured at 0.4 K and 5.2 T/ms (bottom left) and sweep rate dependence of peaks P1-P2 (bottom right) for compound **2**.

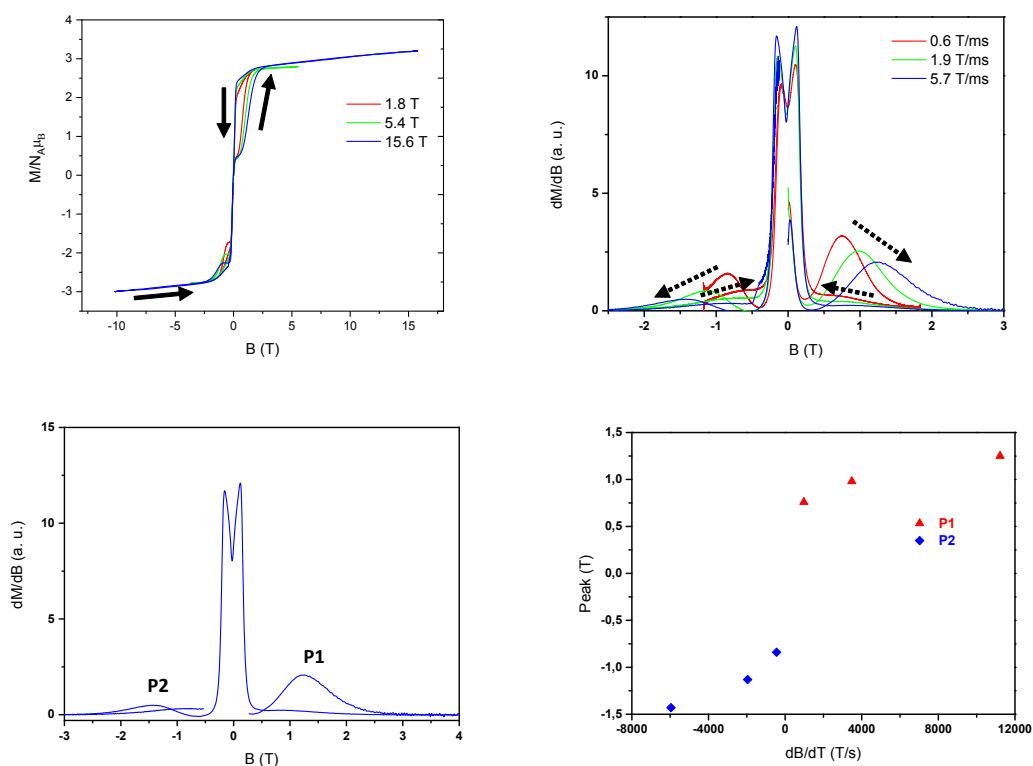

**Figure S28.-** Pulse-field (top left) and differentiate (top right) magnetizations curves for **3** at 0.4 K and at different scan field rates. Differential of magnetization measured at 0.4 K and 5.2 T/ms (bottom left) and sweep rate dependence of peaks P1-P2 (bottom right) for compound **3**.

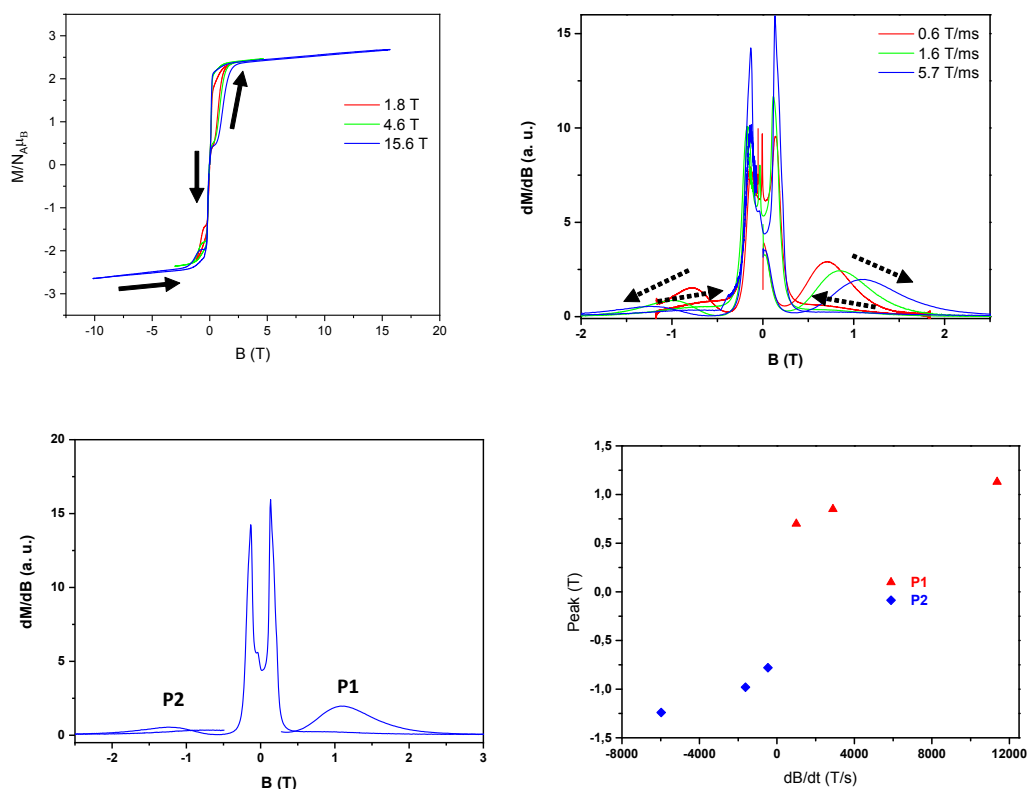

**Figure S29.-** Pulse-field (top left) and differentiate (top right) magnetizations curves for **4** at 0.4 K and at different scan field rates. Differential of magnetization measured at 0.4 K and 5.2 T/ms (bottom left) and sweep rate dependence of peaks P1-P2 (bottom right) for compound **4**.
